# Supplementary material for: The gene expression landscape of breast cancer is shaped by tumor protein p53 status and epithelial-mesenchymal transition
Source: Breast Cancer Res. 2012 Jul 27;14(4):R113. doi: 10.1186/bcr3236 (PMC3680939; doi:10.1186/bcr3236)
Supplement: Additional file 6 — Gene ontology analysis. An Excel table with gene ontology biological processes enriched in the gene expression network modules. [file bcr3236-S6.XLSX]

## Sheet: Sheet1
Supplementary Table 4. Gene ontology biological processes enriched in the eight breast cancer derived gene expression modules.
Analyses were performed using the BINGO Cytoscape plug-in using a p-value cut-off of 0.05 (Benjamini Hochberg correction) and the top 10 terms are listed.
Stroma module	GO term (biological process)	P-value	Corrected p-value	Cluster frequency	Total Frequency	Genes
	Extracellular matrix organization	7.6967e-12	2.8709e-09	8/26 30.7%	103/14304 0.7%	CRISPLD2 POSTN DCN COL5A2 COL11A1 COL8A2 COL5A1 EMILIN1
	Cell adhesion	5.7958e-11	7.3336e-09	13/26 50.0%	711/14304 4.9%	AEBP1 POSTN COL5A1 ITGBL1 EMILIN1 OMD COMP VCAN COL8A2 THBS2 COL11A1 SPON1 CDH11
	Biological adhesion	5.8983e-11	7.3336e-09	13/26 50.0%	712/14304 4.9%	AEBP1 POSTN COL5A1 ITGBL1 EMILIN1 OMD COMP VCAN COL8A2 THBS2 COL11A1 SPON1 CDH11
	Skeletal system development	1.5147e-10	1.4124e-08	10/26 38.4%	332/14304 2.3%	ASPN AEBP1 COMP FBN1 LRRC17 POSTN COL5A2 MMP2 CDH11 COL10A1
	Extracellular structure organization	2.707e-10	2.0194e-08	8/26 30.7%	160/14304 1.1%	CRISPLD2 POSTN DCN COL5A2 COL11A1 COL8A2 COL5A1 EMILIN1
	System development	3.0557e-06	0.00017924	15/26 57.6%	2422/14304 16.9%	ASPN AEBP1 FBN1 POSTN LRRC17 DCN MMP2 COL5A2 COL5A1 FAP COMP VCAN COL8A2 CDH11 COL10A1
	Bone development	3.3637e-06	0.00017924	5/26 19.2%	131/14304 0.9%	ASPN LRRC17 COL5A2 MMP2 CDH11
	Multicellular organismal development	7.181e-06	0.00033481	16/26 61.5%	2972/14304 20.7%	ASPN AEBP1 FBN1 POSTN LRRC17 DCN MMP2 COL5A2 COL5A1 FAP COMP SFRP4 VCAN COL8A2 CDH11 COL10A1
	Anatomical structure development	1.0013e-05	0.00041497	15/26 57.6%	2656/14304 18.5%	ASPN AEBP1 FBN1 POSTN LRRC17 DCN MMP2 COL5A2 COL5A1 FAP COMP VCAN COL8A2 CDH11 COL10A1
	Collagen fibril organization	1.5149e-05	0.00056507	3/26 11.5%	27/14304 0.1%	COL5A2 COL11A1 COL5A1
Lipid module	GO term (biological process)	P-value	Corrected p-value	Cluster frequency	Total Frequency	Genes
	Monocarboxylic acid metabolic process	1.8857e-06	0.0014765	6/19 31.5%	304/14303 2.1%	LEP LPL GPD1 FABP4 IGF1 ADIPOQ
	Regulation of macrophage derived foam cell differentiation	5.0684e-06	0.0019843	3/19 15.7%	26/14303 0.1%	LPL CD36 ADIPOQ
	Regulation of glucose metabolic process	1.5008e-05	0.0033187	3/19 15.7%	37/14303 0.2%	LEP IGF1 ADIPOQ
	Regulation of cellular carbohydrate metabolic process	2.3717e-05	0.0033187	3/19 15.7%	43/14303 0.3%	LEP IGF1 ADIPOQ
	Positive regulation of cholesterol storage	2.4999e-05	0.0033187	2/19 10.5%	6/14303 0.0%	LPL CD36
	Regulation of carbohydrate metabolic process	2.5431e-05	0.0033187	3/19 15.7%	44/14303 0.3%	LEP IGF1 ADIPOQ
	Low-density lipoprotein particle clearance	3.497e-05	0.0039117	2/19 10.5%	7/14303 0.0%	CD36 ADIPOQ
	Regulation of gluconeogenesis	4.659e-05	0.0043762	2/19 10.5%	8/14303 0.0%	LEP ADIPOQ
	Lipid metabolic process	6.0633e-05	0.0043762	7/19 36.8%	834/14303 5.8%	LEP PLIN LPL GPD1 CD36 FABP4 ADIPOQ
	Carboxylic acid metabolic process	6.3366e-05	0.0043762	6/19 31.5%	563/14303 3.9%	LEP LPL GPD1 FABP4 IGF1 ADIPOQ
Immune response module	GO term (biological process)	P-value	Corrected p-value	Cluster frequency	Total Frequency	Genes
	Immune system process	3.5346e-26	3.0927e-23	36/64 56.2%	947/14303 6.6%	CD8A CD247 CXCL9 KLRK1 IFI30 IFI44L OAS1 CCL5 IL7R CXCL11 IGHM CXCL10 DOCK2 SH2D1A ICOS TAP1 CD2 CLEC4A HLA-DOB LTB CD27 PTPRC POU2AF1 CD3G CD3D GZMA CCL19 CTSS C1QA C1QB CORO1A CCR7 CST7 LCK CTSC HLA-DRA
	Immune response	1.5613e-20	6.8306e-18	27/64 42.1%	618/14303 4.3%	CD8A CXCL9 IFI44L OAS1 CXCL11 IGHM IL7R CCL5 CXCL10 SH2D1A ICOS CLEC4A LTB HLA-DOB CD27 PTPRC POU2AF1 GZMA CCL19 CTSS C1QA C1QB CORO1A CCR7 CST7 CTSC HLA-DRA
	Defense response	1.2167e-13	3.5488e-11	21/64 32.8%	620/14303 4.3%	PTPRC GNLY RNASE6 LYZ CXCL9 CCL19 IDO1 PTPRCAP CCL5 CXCL11 CXCL10 C1QA C1QB CORO1A SH2D1A CCR7 TRAC TAP1 CLEC4A MNDA MX1
	Regulation of immune system process	2.2492e-13	4.9201e-11	18/64 28.1%	424/14303 2.9%	PTPRC CD247 KLRK1 IDO1 IL7R CCL5 CXCL10 C1QA CD38 C1QB CORO1A SH2D1A CD37 ICOS LCK TAP1 CD2 CD27
	Positive regulation of immune system process	4.9662e-13	8.6908e-11	15/64 23.4%	265/14303 1.8%	PTPRC CD247 KLRK1 IDO1 IL7R CXCL10 C1QA CD38 C1QB CORO1A SH2D1A CD37 LCK CD2 CD27
	Response to stimulus	2.3153e-12	3.3765e-10	43/64 67.1%	3632/14303 25.3%	CD8A CXCL9 OAS1 IFI44L PTPRCAP CCL5 IL7R CXCL11 IGHM CXCL10 DOCK2 SH2D1A TRAC RAC2 ISG15 ICOS TAP1 CLEC4A MX1 HLA-DOB LTB CD27 PTPRC POU2AF1 SELL GZMA GNLY RNASE6 LYZ CCL19 IDO1 CTSS STAT1 C1QA CD38 C1QB CORO1A CCR7 CST7 LCK MNDA CTSC HLA-DRA
	Regulation of lymphocyte activation	1.7344e-09	2.168e-07	10/64 15.6%	157/14303 1.0%	PTPRC CD38 CORO1A ICOS LCK CD2 KLRK1 IDO1 IL7R CD27
	Regulation of leukocyte activation	6.1879e-09	6.2646e-07	10/64 15.6%	179/14303 1.2%	PTPRC CD38 CORO1A ICOS LCK CD2 KLRK1 IDO1 IL7R CD27
	Regulation of immune response	6.4436e-09	6.2646e-07	11/64 17.1%	235/14303 1.6%	C1QA PTPRC C1QB CD37 SH2D1A ICOS TAP1 CD247 KLRK1 IDO1 IL7R
	Regulation of cell activation	1.1546e-08	1.0102e-06	10/64 15.6%	191/14303 1.3%	PTPRC CD38 CORO1A ICOS LCK CD2 KLRK1 IDO1 IL7R CD27
Mitotic checkpoint module	GO term (biological process)	P-value	Corrected p-value	Cluster frequency	Total Frequency	Genes
	M-phase	1.5986e-16	7.9932e-14	13/21 61.9%	351/14305 2.4%	EXO1 CDC2 DLGAP5 TPX2 TTK CENPE CDC20 NDC80 BIRC5 NCAPH MAD2L1 CCNB2 CKS2
	Cell cycle phase	2.5223e-15	4.2513e-13	13/21 61.9%	434/14305 3.0%	EXO1 CDC2 DLGAP5 TPX2 TTK CENPE CDC20 NDC80 BIRC5 NCAPH MAD2L1 CCNB2 CKS2
	Cell cycle process	2.5508e-15	4.2513e-13	14/21 66.6%	581/14305 4.0%	EXO1 CDC2 DLGAP5 TPX2 TTK CENPE CDC20 NDC80 BIRC5 NCAPH MAD2L1 CCNB2 CENPA CKS2
	Mitotic cell cycle	2.3874e-14	2.9843e-12	12/21 57.1%	379/14305 2.6%	NCAPH CCNB2 MAD2L1 CENPA CDC2 DLGAP5 TPX2 TTK BIRC5 NDC80 CDC20 CENPE
	Cell cycle	1.8728e-13	1.8728e-11	14/21 66.6%	793/14305 5.5%	EXO1 CDC2 DLGAP5 TPX2 TTK CENPE CDC20 NDC80 BIRC5 NCAPH MAD2L1 CCNB2 CENPA CKS2
	Nuclear division	3.1295e-13	2.2354e-11	10/21 47.6%	232/14305 1.6%	NCAPH CCNB2 MAD2L1 CDC2 DLGAP5 TPX2 BIRC5 NDC80 CDC20 CENPE
	Mitosis	3.1295e-13	2.2354e-11	10/21 47.6%	232/14305 1.6%	NCAPH CCNB2 MAD2L1 CDC2 DLGAP5 TPX2 BIRC5 NDC80 CDC20 CENPE
	M-phase of mitotic cell cycle	4.2165e-13	2.5466e-11	10/21 47.6%	239/14305 1.6%	NCAPH CCNB2 MAD2L1 CDC2 DLGAP5 TPX2 BIRC5 NDC80 CDC20 CENPE
	Organelle fission	4.5838e-13	2.5466e-11	10/21 47.6%	241/14305 1.6%	NCAPH CCNB2 MAD2L1 CDC2 DLGAP5 TPX2 BIRC5 NDC80 CDC20 CENPE
	Cell division	6.4138e-12	3.2069e-10	10/21 47.6%	314/14305 2.1%	NCAPH CCNB2 MAD2L1 CDC2 CKS2 TPX2 BIRC5 NDC80 CDC20 CENPE
Mitotic progression module	GO term (biological process)	P-value	Corrected p-value	Cluster frequency	Total Frequency	Genes
	M-phase	4.1749e-15	1.4612e-12	12/20 60.0%	351/14305 2.4%	CDCA8 PRC1 NCAPG KIF15 KIF18A NUSAP1 PBK CEP55 TACC3 ASPM ERCC6L CDCA3
	Cell cycle phase	5.4401e-14	7.8075e-12	12/20 60.0%	435/14305 3.0%	CDCA8 PRC1 NCAPG KIF15 KIF18A NUSAP1 PBK CEP55 TACC3 ASPM ERCC6L CDCA3
	Cell cycle	6.6922e-14	7.8075e-12	14/20 70.0%	794/14305 5.5%	PRC1 KIF15 E2F8 KIF18A NUSAP1 CEP55 PBK TACC3 CDCA8 NCAPG HJURP ASPM ERCC6L CDCA3
	Mitosis	1.6627e-13	1.1639e-11	10/20 50.0%	232/14305 1.6%	CDCA8 NCAPG KIF15 KIF18A NUSAP1 PBK CEP55 ASPM ERCC6L CDCA3
	Nuclear division	1.6627e-13	1.1639e-11	10/20 50.0%	232/14305 1.6%	CDCA8 NCAPG KIF15 KIF18A NUSAP1 PBK CEP55 ASPM ERCC6L CDCA3
	M-phase of mitotic cell cycle	2.2413e-13	1.2184e-11	10/20 50.0%	239/14305 1.6%	CDCA8 NCAPG KIF15 KIF18A NUSAP1 PBK CEP55 ASPM ERCC6L CDCA3
	Organelle fission	2.4368e-13	1.2184e-11	10/20 50.0%	241/14305 1.6%	CDCA8 NCAPG KIF15 KIF18A NUSAP1 PBK CEP55 ASPM ERCC6L CDCA3
	Mitotic cell cycle	5.4591e-13	2.3883e-11	11/20 55.0%	380/14305 2.6%	CDCA8 PRC1 NCAPG KIF15 KIF18A NUSAP1 PBK CEP55 ASPM ERCC6L CDCA3
	Cell cycle process	1.7206e-12	6.6912e-11	12/20 60.0%	582/14305 4.0%	CDCA8 PRC1 NCAPG KIF15 KIF18A NUSAP1 PBK CEP55 TACC3 ASPM ERCC6L CDCA3
	Organelle organization	1.2856e-10	4.4997e-09	14/20 70.0%	1382/14305 9.6%	KIF4A PRC1 KIF15 KIF18A NUSAP1 CEP55 PBK TACC3 CDCA8 NCAPG HJURP ASPM ERCC6L CDCA3
Basal module	GO term (biological process)	P-value	Corrected p-value	Cluster frequency	Total Frequency	Genes
	Hemidesmosome assembly	1.5012e-05	0.0011311	2/8 25.0%	11/14306 0.0%	KRT5 KRT14
	Tissue development	1.9171e-05	0.0011311	5/8 62.5%	750/14306 5.2%	KRT17 SFRP1 KRT5 SERPINB5 KRT14
	Intermediate filament cytoskeleton organization	4.6571e-05	0.0016862	2/8 25.0%	19/14306 0.1%	KRT14 SYNM
	Intermediate filament-based process	5.716e-05	0.0016862	2/8 25.0%	21/14306 0.1%	KRT14 SYNM
	Prostate gland morphogenesis	8.8338e-05	0.0019458	2/8 25.0%	26/14306 0.1%	SFRP1 SERPINB5
	Cell-substrate junction assembly	0.00011026	0.0019458	2/8 25.0%	29/14306 0.2%	KRT5 KRT14
	Epidermis development	0.00011543	0.0019458	3/8 37.5%	186/14306 1.3%	KRT17 KRT5 KRT14
	Ectoderm development	0.00014742	0.0021744	3/8 37.5%	202/14306 1.4%	KRT17 KRT5 KRT14
	Prostate gland development	0.00018047	0.0023662	2/8 25.0%	37/14306 0.2%	SFRP1 SERPINB5
	Cell junction assembly	0.00038592	0.0045539	2/8 25.0%	54/14306 0.3%	KRT5 KRT14
Early response module	GO term (biological process)	P-value	Corrected p-value	Cluster frequency	Total Frequency	Genes
	Response to protein stimulus	1.0476e-05	0.0024618	3/6 50.0%	117/14305 0.8%	EGR1 FOS CYR61
	Behavior	1.5832e-05	0.0024618	4/6 66.6%	466/14305 3.2%	EGR1 FOS FOSB CYR61
	Cellular response to organic substance	8.875e-05	0.0092004	3/6 50.0%	239/14305 1.6%	EGR1 FOS DUSP1
	Response to cAMP	0.00017091	0.01087	2/6 33.3%	49/14305 0.3%	FOS DUSP1
	Response to organic substance	0.00018381	0.01087	4/6 66.6%	869/14305 6.0%	EGR1 FOS DUSP1 CYR61
	Positive regulation of cellular process	0.0002848	0.01087	5/6 83.3%	2004/14305 14.0%	ZFP36 EGR1 FOS DUSP1 CYR61
	Cellular response to chemical stimulus	0.00040458	0.01087	3/6 50.0%	399/14305 2.7%	EGR1 FOS DUSP1
	Regulation of nuclear-transcribed mRNA poly(A) tail shortening	0.00041943	0.01087	1/6 16.6%	1/14305 0.0%	ZFP36
	Positive regulation of nuclear-transcribed mRNA poly(A) tail shortening	0.00041943	0.01087	1/6 16.6%	1/14305 0.0%	ZFP36
	Positive regulation of mRNA catabolic process	0.00041943	0.01087	1/6 16.6%	1/14305 0.0%	ZFP36
Steroid response module
	No significantly enriched categories at p<0.05
